# Supplementary material for: Babes in the wood – a unique window into sea scorpion ontogeny
Source: PubMed Central journal article supplement (PMC3679797; doi:10.1186/1471-2148-13-98), 2013-05-10
Supplement: 1471-2148-13-98-S1.pdf [file 1471-2148-13-98-S1.pdf]

# **ELECTRONIC APPENDIX**

This is the Electronic Appendix to the article  
**Babes in the wood – a unique window into sea scorpion ontogeny**

by

James C. Lamsdell and Paul A. Selden

Comprising the morphological character list and character matrix used in the  
phylogenetic analysis

## Character list

1. Angular projection on the anterior of the carapace: absent (0); present (1).
2. Anterior margin of carapace: unornamented (0); denticulate (1).
3. Carapace marginal rim: present (0); absent (1).
4. Carapace genal spines: present (0); absent (1).
5. Carapace shape: horseshoe or wide-horseshoe (0); semicircular (1); quadrate (2); trapezoidal (3); wide-rectangular (4); subquadrate (5); campanulate (6); parabolic (7); spatulate (8); triangular (9); long-rectangular (10).
6. Carapace genal facets: absent (0); present (1).
7. Angle of genal facets: low angle (0); high angle (1).
8. Lateral eye shape: crescentic (0); expanded (1).
9. Size of palpebral lobe: small (0); large (1); absent (2).
10. Lateral eye position: centrilateral (0); centrimesial (1); antelateral (2); central (3); antemesial (4).
11. Lateral eye abuts carapace margin: absent (0); present (1).
12. Lateral eyes associated with ophthalmic ridge: present (0); absent (1).
13. Suture on ventral plates: *Eurypterus*-type (0); *Hughmilleria*- or *Hallipterus*-type (1); *Megalograptus*-type (2); *Erieopterus*-type (3).
14. Transverse suture on ventral plates: present (0); absent (1).
15. Chelicerae: small (0); able to extend beyond marginal rim (1).
16. Form of cheliceral peduncle: approximately equal in length to fixed ramus (0); longer than fixed ramus (1).

17. Denticles on chela: absent (0); present, small, undifferentiated (1); present, large, differentiated (2).
18. Largest denticle medially on fixed ramus: erect (0); inclined (1); acute (2).
19. Angular distal teeth on both rami: absent (0); present (1).
20. Relative lengths of appendages II-V: increasing posteriorly (0); forward appendages enlarged (1).
21. Morphology of spines on prosomal appendages II-IV: reduced [length < width of podomere] (0); regular [length  $\approx$  width of podomere] (1); enlarged [length > width of podomere] (2); absent (3).
22. Mobility of spines on appendages II-V: fixed (0); moveable (1).
23. Orientation of spines on appendages II-V: ventral (0); anterior (1).
24. Spines on appendages II-V: thickened and highly sclerotised absent (0); present (1).
25. Armature of anterior prosomal appendages flattened and laterally expanded into blades: absent (0); present (1).
26. Prosomal appendage podomeres thicken distally: absent (0); present (1).
27. Morphology of appendage V podomeres: undifferentiated and broad (0); podomeres tubular, lacking armature except for penultimate distal podomere (1).
28. Appendage V armature: non-spiniferous (0); spiniferous (1).
29. Coxal lade: absent (0); present (1).
30. Morphology of prosomal appendage VI: equal in width along length (0); distally expanded into swimming leg (1).
31. First podomere of prosomal appendage VI that fully projects beyond carapace margin: Fourth podomere (0); Sixth podomere (1); Third podomere (2).

32. Shape of proximal podomere of appendage VI: narrow [ $L/W \geq 2.0$ ] (0); expanded [ $L/W < 2.0$ ] (1).
33. Anterior margin of coxa VI undifferentiated (0); expanded to form 'ear' (1).
34. Shape of 'ear' on coxa VI: triangular (0); rectangular (1); subquadrate/semicircular (2).
35. Anterior denticle of coxa VI large: absent (0); present (1).
36. Angle between VI-3 and VI-4:  $180^\circ$  (0); not  $180^\circ$  (1).
37. Length of podomeres VI-4 and VI-5:  $VI-5 > VI-4$  (0);  $VI-4 \geq VI-5$  (1).
38. Length of podomeres VI-4 when VI-5 is not longer:  $>VI-3$  and VI-5 (0); equal to VI-3 and VI-5 (1).
39. Podomere VI-5 bordering podomere VI-7: absent (0); present (1).
40. Distal podomere margin of VI-6 modified: absent (0); present (1).
41. VI-7 lateral margins: unornamented (0); enlarged serrations (1); small serrations (2).
42. Angular projection on the anterior of podomere VI-7: absent (0); present (1).
43. Podomere 7a on appendage VI: absent (0); present on posterior of appendage (1); present on anterior of appendage (2).
44. Width of posterior VI-7a: narrow [less than 50% width of VI-7] (0); wide [more than 50%] (1).
45. Shape of posterior VI-7a: oval (0); triangular (1).
46. VI-8 lateral margins: unornamented (0); small serrations (1); enlarged serrations (2).
47. VI-8 anterior projection: absent (0); present (1).
48. Additional moveable lobe on VI-8: absent (0); present (1).
49. Morphology of VI-8/VI-9 joint: joint flush (0); VI-9 set into VI-8 (1).

50. Length of VI-9 (as ratio of VI-8): large [ $>25\%$  of VI-8 length] (0); small [ $<25\%$  of VI-8 length] (1); totally absent (2).
51. Shape of podomere VI-9: spinose (0); triangular, pentagonal or oval (1).
52. VI-9 margin: no ornament (0); serrated (1).
53. VI-9 position: centrally on podomere 8 (0); migrating towards posterior of podomere 8 (1).
54. VI-9 expanded: absent (0); present (1).
55. Podomere cuticular morphology: rounded (0); ridged (1).
56. Metastoma anterior: smooth or shallow notch (0); deeply notched (1).
57. Shape of posterior margin of metastoma: rounded (0); truncated/flattened (1); angular (2); notched (3).
58. Metastoma with posterior median cleft: absent (0); present (1).
59. Metastoma shape: broad (0); petaloid, markedly narrower in width (1).
60. First segment expressed dorsally: expressed (0); folded under carapace (1).
61. Microtergite: absent (0); present (1).
62. Genital operculum morphology: consisting of three visible segments (0); consisting of two visible segments (1); unfused (2).
63. Morphology of anterior opercular plate: fully expressed (0); lateral expression only (1); completely suppressed (2).
64. Thickness of anterior opercular plate: fully expressed (0); narrow (1).
65. MOP and POP morphology: separate/with clear suture (0); without suture but with ornament differentiation (1); without suture and without ornament differentiation (2).

66. Unsegmented genital appendages: absent (0); present (1).
67. Type-A genital appendage spoon-shaped: absent (0); present (1).
68. Type-A genital appendage with median, distal indentation: absent (0); present (1).
69. Type-B genital appendage oval: absent (0); present (1).
70. Morphology of type A genital appendage furca: fused (0); unfused (1).
71. Spatulae on type A genital appendage: absent (0); present (1).
72. Morphology of spatulae: angular (0); rounded (1).
73. Moveable preabdominal spines: absent (0); present (1).
74. Postabdominal epimera: present (0); absent (1).
75. Preabdominal/postabdominal boundary: between 7th and 8th segments (0); between 6th and 7th segments (1); between 4th and 5th segments (2).
76. Epimera on segment 7: absent (0); present (1).
77. Number of segments in postabdomen: 3 (0); 5 or 6 (1); 9 (2).
78. Postabdomen: undifferentiated (0); narrowing from preabdomen (1).
79. Caudal postabdoment: absent (0); present (1).
80. Posterior margin of all opisthosomal tergites crenulate: absent (0); present (1).
81. Posterior margin of segments 7-9: smooth (0); dentate (1).
82. Posterior margin of segments 10-12: smooth (0); dentate (1).
83. Epimera on pretelson: absent (0); angular (1); rounded (2); quadrate (3).
84. Laterally expanded pretelson: absent (0); present (1).
85. Median carina on pretelson: absent (0); present (1).
86. Telson shape: straight (0); curved (1); laterally expanded (2).
87. Laterally expanded telson shape: rounded (0); triangular (1).

88. Telson base: flattened (0); bulbous expansion (1).
89. Telson bilobed: absent (0); present (1).
90. Median carina on telson: absent (0); low carina (1); vertical rudder (2).
91. Telson laterally ornamented with scales: absent (0); present (1).
92. Telson margin: smooth (0); serrated (1).
93. Opisthosoma lateral division: none (0); trilobed (1).
94. Primary opisthosomal ornamentation: scales (0); closely spaced pustules (1); coarse pustules (2).
95. Primary carapace ornamentation: scales (0); closely spaced pustules (1); coarse pustules (2).
96. Principal scale on carapace: absent (0); present (1).
97. Carapace ornament including elongate pustules that angle away from the lateral eyes and curve around the carapace margin: absent (0); present (1).
98. Row of node-like scales on dorsal opisthosomal segments: absent (0); present (1).
99. Ornamentation of angular scales across posterior of tergite segments: absent (0); present (1).
100. Longitudinal rows of angular scales on tergites: absent (0); present (1).
101. Ornament of chevron scales: absent (0); present (1).
102. Ornament of linguoid scales: absent (0); present (1).
103. Form of posterior margin of articulating facet on tergites: row of pustules (0); row of scales (1); groove (2).

104. Genital operculum striate ornament marked by highly sclerotised, broad lunate scales: ornament independent of sclerotised scales (0); ornament congruent with broad, sclerotised lunate scales (1).



### Character matrix (main analysis)

(A = [0,1]; B = [1,2])

| Taxon                               | 10    | 20    | 30    | 40    | 50    | 60    | 70    | 80    | 90    | 100   |       |       |       |       |       |       |       |       |       |       |       |      |
|-------------------------------------|-------|-------|-------|-------|-------|-------|-------|-------|-------|-------|-------|-------|-------|-------|-------|-------|-------|-------|-------|-------|-------|------|
| <i>Weinbergina opitzi</i>           | 00100 | 0-0-? | 00310 | 00--0 | 11000 | 00000 | 010-0 | 00-00 | 000-- | 00000 | 00000 | ---0  | 022-0 | ----- | --000 | 00000 | 00000 | 0-000 | 00011 | 00000 | 0000  |      |
| <i>Chasmataspis laurencii</i>       | 00000 | 0-101 | 01??? | ????? | ????? | 0???  | ?00-0 | 00-00 | 000-- | 000-- | ---0  | ????? | 1???? | ????? | ??002 | 02110 | 00000 | 0-000 | 00122 | 00100 | 00??  |      |
| <i>Octoberaspis ushakovi</i>        | 00003 | 0-000 | 00??? | ????? | ????? | 000?1 | 0???? | ???   | 002-- | 00002 | ---0  | 02000 | 12000 | 00010 | 0-002 | 02100 | 00100 | 0-000 | 00022 | 00000 | 00??  |      |
| <i>Diploaspis casteri</i>           | 00003 | 0-100 | 001?? | ????? | 00000 | 0???  | 0???? | ???   | 002-- | 00002 | ---0  | ????? | 1200? | ????? | ??002 | 02100 | 00000 | 20000 | 01022 | 00100 | 00??  |      |
| <i>Loganamarpis dunlopi</i>         | 00003 | 0-?0? | ??310 | 00--? | ????? | 0???  | 000-? | 0???? | ????? | ????? | ????? | 02000 | 12000 | 000?0 | 0-012 | 02100 | 00000 | 0-?00 | 0?0-- | -0000 | 00??  |      |
| <i>Brachyopterus stubblefieldi</i>  | 00018 | 0-001 | 01?0? | ????? | 00000 | 000?0 | 000-? | 00-00 | 000-- | 00000 | 00001 | 0???  | 0???? | 0???? | ??0?0 | 01000 | 00000 | 0-000 | 000-- | -0000 | 00??  |      |
| <i>Rhenopterus diensti</i>          | 00017 | 0-001 | 01000 | 00--0 | 00000 | 00000 | 000-0 | 00-00 | 000-- | 00000 | 00001 | 00001 | 00000 | 0???  | 0-001 | 01110 | 00000 | 1-000 | 00000 | 00000 | 0000  |      |
| <i>Parastylonurus ornatus</i>       | 00010 | 0-000 | 01000 | 00--0 | 11000 | 00000 | 200-0 | 00-00 | 000-- | 00000 | 00000 | 11011 | 00000 | 00000 | 10000 | 01101 | 00100 | 0-001 | 00000 | 00000 | 00?0  |      |
| <i>Laurieipterus elegans</i>        | 01018 | 0-000 | 0110? | ????? | 10000 | 00000 | 200-0 | 00-00 | 000-- | 000?? | ????? | 1100? | 0???? | ????? | ??0?? | ????? | ????? | ????? | ????? | ??000 | 00000 | 00?0 |
| <i>Kokomopterus longicaudatus</i>   | 00015 | 0-001 | 01??? | ????? | 11000 | 10100 | 000-0 | 00-00 | 000-- | 00000 | 00000 | 1100? | 0???? | ????? | ??010 | 01101 | 00000 | 0-000 | 00111 | 00000 | 01?0  |      |
| <i>Hardieopterus macrophthalmus</i> | 00010 | 0-001 | 01000 | 00--0 | ????? | 10100 | 000-0 | 00-00 | 000-- | 00000 | 00000 | 1100? | 0???? | ????? | ??000 | 01101 | 00300 | 0-000 | 00111 | 00000 | 01?0  |      |
| <i>Drepanopterus pentlandicus</i>   | 00010 | 10001 | 01000 | 00--0 | 1A001 | 10000 | 000-0 | 00-00 | 000-- | 00000 | 00000 | 11101 | 00000 | ?001? | 10010 | 01100 | 00000 | 0-000 | 00011 | 00000 | 0000  |      |
| <i>Hibbertopterus scouleri</i>      | 00010 | 11003 | 01000 | 00--0 | 2A001 | 10010 | 000-0 | 00-00 | 000-- | 000?? | ????? | 1110? | 0???? | ????? | ??010 | 01001 | 00000 | 0-000 | 00000 | 00000 | 01?0  |      |
| <i>Megarachne servinei</i>          | 00013 | 0-003 | 01??? | ????? | 2A001 | 1001? | ?00-0 | ????? | ????? | ????? | ????? | ????? | 0???? | ????? | ????? | ????? | ????? | ????? | ????? | ??000 | 00??? | ???? |
| <i>Stoermeropterus conicus</i>      | 00010 | 0-001 | 01110 | 00--0 | 00000 | 00000 | 01100 | 00-00 | 00100 | 00000 | 00001 | 10001 | 00010 | 00010 | 10100 | 01000 | 01B00 | 0-100 | 00011 | 00000 | 0000  |      |
| <i>Stoermeropterus latus</i>        | 00010 | 0-001 | 01110 | 00--? | ????? | 0???  | 0???  | 00-00 | 00100 | 00000 | 00001 | ????? | 00010 | 000?? | 11100 | 01000 | 01100 | 0-100 | 00000 | 00000 | 00?0  |      |
| <i>Stoermeropterus nodosus</i>      | 00010 | 0-001 | 01??? | ????? | ????? | 0???  | ????? | ????? | ????? | ????? | ????? | 10001 | 00010 | 000?0 | 11100 | 01000 | 0?200 | 0-100 | 00011 | 00100 | 00??  |      |

|                                       |       |       |       |       |       |       |       |       |       |       |       |       |       |       |       |       |       |       |       |       |      |
|---------------------------------------|-------|-------|-------|-------|-------|-------|-------|-------|-------|-------|-------|-------|-------|-------|-------|-------|-------|-------|-------|-------|------|
| <i>Vinetoferus struvei</i>            | 01010 | 0-001 | 01310 | 00--0 | 00000 | 00000 | 01100 | 00-00 | 00100 | 00000 | 00001 | 00001 | 00010 | 0??1? | ??000 | 01100 | 11000 | 0-?00 | 00011 | 00100 | 0000 |
| <i>Vinetoferus martini</i>            | 01010 | 0-?01 | 0131? | ????? | 00000 | 00000 | 0???? | 00-00 | 00100 | 00000 | 00001 | ????1 | 0???? | ????? | ??000 | 01100 | 11000 | 0-?00 | 00011 | 00100 | 00?? |
| <i>Moselopterus ancylotelson</i>      | 00010 | 0-001 | 01310 | 00--0 | 10000 | 00000 | 01100 | 00-00 | 00100 | 00000 | 00001 | 00001 | 00010 | 0001? | 10010 | 01100 | 11000 | 1-000 | 01011 | 00100 | 0000 |
| <i>Moselopterus elongatus</i>         | 00010 | 0-001 | 01310 | 00--0 | 10000 | 00000 | 01100 | 00-00 | 00100 | 00000 | 00001 | 00001 | 00010 | ????? | ??010 | 01100 | 11000 | 1-000 | 01011 | 00?00 | 0000 |
| <i>Onychopterella augusti</i>         | 00015 | 0-?01 | 01??? | ????? | 11000 | 0??01 | 01100 | 00-00 | 00101 | 00010 | 00000 | ????? | 0???? | ????? | 0-000 | 01100 | 00000 | 0-100 | 00000 | 0?000 | 00?? |
| <i>Onychopterella kokomoensis</i>     | 00015 | 0-101 | 01310 | 00--0 | 11000 | 00101 | 01??? | 00-00 | 00101 | 00010 | 00000 | 00001 | 00010 | 000?1 | 0-000 | 01100 | 00200 | 0-100 | 00000 | 0?000 | 00?0 |
| <i>Dolichoferus macrocheirus</i>      | 00012 | 0-012 | 01010 | 00--0 | 21000 | 00101 | 01110 | 11001 | 11101 | 20110 | 11010 | 11011 | 00110 | 000?0 | 10000 | 01100 | 00100 | 0-000 | 00000 | 00000 | 0000 |
| <i>Euryferus remipes</i>              | 00013 | 10101 | 01010 | 00--0 | 11000 | 01101 | 01120 | 01001 | 00111 | 10011 | 10000 | 00001 | 00110 | 00001 | 0-010 | 01100 | 00000 | 0-000 | 01000 | 10011 | 0010 |
| <i>Hughmilleria socialis</i>          | 00017 | 0-122 | 11111 | 00--0 | 11000 | 00101 | 01120 | 01101 | 00111 | 00011 | 10100 | 0100? | 012-2 | 00010 | 0-010 | 11100 | 00000 | 0-000 | 00000 | 00000 | 11?0 |
| <i>Tyloferella boylei</i>             | 00015 | 0-101 | 01??? | ????? | ????? | ????? | ????? | ????? | ????? | ????? | ????? | ????? | 0???? | ????? | ??001 | 01100 | 00000 | 0-000 | 00000 | 00000 | 00?? |
| <i>Megalograptus ohioensis</i>        | 01012 | 10104 | 01210 | 00--1 | 21110 | 01101 | 01120 | 01001 | 00111 | 00012 | ---0  | 03001 | 012-1 | 00000 | 0-011 | 01100 | 00000 | 0-000 | 00100 | 00011 | 0010 |
| <i>Mixopterus kiaeri</i>              | 00012 | 10104 | 01?10 | 00--1 | 21110 | 00101 | 01120 | 01111 | 00111 | 00011 | 10000 | 0000? | 012-2 | 000?0 | 0-010 | 01110 | 00000 | 1-000 | 00100 | 00000 | 00?0 |
| <i>Strobilopterus laticeps</i>        | 00011 | 0-011 | 01??? | ????? | ????? | ????? | 1???? | 01101 | 00111 | 00-11 | 10000 | 1101? | ?0110 | 000?0 | 10??? | ????? | ????? | ????? | ????? | 0???? | ???  |
| <i>Strobilopterus princetonii</i>     | 00011 | 10013 | 01??? | 00--0 | 10000 | 0??01 | 11120 | 01101 | 10111 | 20110 | 11000 | 1?01? | 0???  | 000?0 | 10000 | 11100 | 00000 | ????? | ??011 | 0?0?0 | 0001 |
| <i>Strobilopterus richardsoni</i>     | 00011 | 0-013 | 0131? | ????? | ????? | ????? | ????? | ????? | 10111 | 20011 | 10000 | ????? | ????? | ????? | ????? | ????? | ????? | ????? | ??011 | 010?? | 00?? |
| <i>Strobilopterus proteus</i>         | 00011 | 10013 | 0131? | ????? | 10000 | 00101 | 111?0 | 01101 | 10111 | 20110 | 11000 | 1001? | 0???  | 00010 | 10000 | 11100 | 00000 | ????? | ??011 | 01010 | 0001 |
| <i>Buffalopterus pustulosus</i>       | 00011 | 0-011 | 0131? | ????? | ????? | ????? | 1???? | ????? | ????? | ????? | ????? | ????? | 00110 | 000?? | 0-000 | 01100 | 00100 | 20000 | 01011 | 01010 | 0000 |
| <i>Erieopterus microphthalmus</i>     | 00014 | 11001 | 01310 | 00--0 | 10000 | 01101 | 01120 | 01001 | 00111 | 00011 | 00000 | 01001 | 00110 | 000?1 | 0-010 | 01100 | 00100 | 1-000 | 00000 | 00000 | 00?0 |
| <i>Paraerypterus anatoliensis</i>     | 00012 | 10011 | 01?1? | ????? | 11000 | 0???  | 0???  | 010?? | ????? | ????? | ????? | ????? | 0???  | ????? | ??0?0 | 0???  | ????? | ????? | ??001 | 00010 | 001? |
| <i>Pentlandopterus minor</i>          | 00012 | 10011 | 01??? | ????? | ????? | ????? | 0???  | 010?? | ????? | ????? | ????? | ????? | 0???  | ????? | ??010 | 01100 | 00000 | 0-000 | 00011 | 00000 | 000? |
| <i>Dolichoferus jewetti</i>           | 00012 | 0-012 | 0???  | 00--0 | 21000 | 00101 | 01110 | 11001 | 11101 | 20110 | 11010 | 11001 | 00110 | 000?0 | 10000 | 01100 | 00100 | 0-000 | 00001 | 00?00 | 0000 |
| <i>Ruedemannipterus stylonuroides</i> | 10016 | 0-012 | 01??? | ????? | ????? | ????? | 0???  | 11001 | ?1101 | ?0110 | 10110 | ????? | 0???  | ????? | ??0?? | ????? | ????? | ????? | ??011 | 00000 | 00?? |
| <i>Clarkeipterus testudineus</i>      | 10002 | 0-012 | 01??? | ????? | ????? | ????? | 0???  | 11001 | ?1101 | ?0?10 | 10010 | ????? | ????? | ????? | ????? | ????? | ????? | ????? | ????? | 00?00 | ???? |



**Character matrix addition (juvenile instars)**

| <b>Instar</b>                       | <b>10</b> | <b>20</b> | <b>30</b> | <b>40</b> | <b>50</b> | <b>60</b> | <b>70</b> | <b>80</b> | <b>90</b> | <b>100</b> |       |       |       |       |       |       |       |       |       |       |      |
|-------------------------------------|-----------|-----------|-----------|-----------|-----------|-----------|-----------|-----------|-----------|------------|-------|-------|-------|-------|-------|-------|-------|-------|-------|-------|------|
| <i>Strobilopterus proteus</i> α     | 00001     | 0-011     | 0131?     | ????0     | 10000     | 0010?     | 011?0     | 0110?     | ?????     | ?????      | ????0 | 1001? | 0???? | 000?0 | 10000 | 11100 | 00000 | ????? | ??011 | 00000 | 000? |
| <i>Strobilopterus proteus</i> β     | 00011     | 10013     | 01???     | ????0     | 10000     | 0??01     | 011??     | 01101     | ?????     | ?????      | ????0 | ????? | 0???? | ????? | ??000 | 11100 | 00000 | ????? | ??011 | 00000 | 000? |
| <i>Strobilopterus princetonii</i> γ | 00011     | 10013     | 01???     | ????0     | 10000     | 0???1     | 1????     | ??01      | 10111     | 10011      | 10000 | ????? | 0???? | ????? | ??000 | 11100 | 00000 | ????? | ??011 | 0?0?0 | 000? |
